# Supplementary material for: In Vitro Fermentation of Hyaluronan with Different Molecular Weights by Human Gut Microbiota: Differential Effects on Gut Microbiota Structure and Metabolic Function
Source: MDPI journal article supplement (doi:10.3390/polym15092103), 2023-04-28
Supplement: s1 [file s1]

**Table S1.** Totally 38 metabolites were identified as biomarkers with large between-group differences, which represent characteristic biomarkers with high intra-group confidence.

| No. | Compound name                       | Chemical Formula | VIP score |
|-----|-------------------------------------|------------------|-----------|
| 1   | Inosine                             | C10 H12 N4 O5    | 2.33      |
| 2   | Guanosine                           | C10 H13 N5 O5    | 2.30      |
| 3   | DL-Carnitine                        | C7 H15 N O3      | 2.24      |
| 4   | Nicotinamide                        | C6 H6 N2 O       | 2.10      |
| 5   | Adenosine                           | C10 H13 N5 O4    | 2.07      |
| 6   | Thymidine                           | C10 H14 N2 O5    | 2.06      |
| 7   | Adenosine 3'5'-cyclic monophosphate | C10 H12 N5 O6 P  | 2.03      |
| 8   | 1-Methylguanine                     | C6 H7 N5 O       | 2.00      |
| 9   | Cyclo(leucylprolyl)                 | C11 H18 N2 O2    | 1.96      |
| 10  | Acrylic acid                        | C3 H4 O2         | 1.94      |
| 11  | N6-Me-Adenosine                     | C11 H15 N5 O4    | 1.93      |
| 12  | 7-Methylguanine                     | C6 H7 N5 O       | 1.93      |
| 13  | D-(+)-Glucose                       | C6 H12 O6        | 1.81      |
| 14  | Cyclo(phenylalanyl-prolyl)          | C14 H16 N2 O2    | 1.80      |
| 15  | Adenosine 5'-monophosphate          | C10 H14 N5 O7 P  | 1.77      |
| 16  | 5-Aminovaleric acid                 | C5 H11 N O2      | 1.73      |
| 17  | L-(+)-Arginine                      | C6 H14 N4 O2     | 1.69      |
| 18  | 2-Hydroxyphenylalanine              | C9 H11 N O3      | 1.63      |
| 19  | 2'-Deoxyadenosine                   | C10 H13 N5 O3    | 1.63      |
| 20  | Citric acid                         | C6 H8 O7         | 1.62      |
| 21  | L-Phenylalanine                     | C9 H11 N O2      | 1.58      |
| 22  | NN-dimethyl-9H-purin-6-amine        | C7 H9 N5         | 1.53      |
| 23  | Glycyl-L-leucine                    | C8 H16 N2 O3     | 1.50      |
| 24  | $\beta$ -Alanine                    | C3 H7 N O2       | 1.48      |
| 25  | DL-3-Aminoisobutyric acid           | C4 H9 N O2       | 1.48      |
| 26  | N-Acetylanthranilic acid            | C9 H9 N O3       | 1.46      |
| 27  | Picolinic acid                      | C6 H5 N O2       | 1.40      |
| 28  | Trigonelline                        | C7 H7 N O2       | 1.39      |
| 29  | N-Acetyl-L-tyrosine                 | C11 H13 N O4     | 1.34      |
| 30  | Uracil                              | C4 H4 N2 O2      | 1.26      |
| 31  | N-Acetyl- $\alpha$ -D-glucosamine   | C8 H15 N O6      | 1.20      |
| 32  | 1-Methylhistidine                   | C7 H11 N3 O2     | 1.18      |
| 33  | N-Butyl-N'-(2-phenoxyphenyl)urea    | C17 H20 N2 O2    | 1.16      |
| 34  | 6-Hydroxynicotinic acid             | C6 H5 N O3       | 1.14      |
| 35  | Linoleic acid                       | C18 H32 O2       | 1.14      |
| 36  | Guanine                             | C5 H5 N5 O       | 1.11      |
| 37  | Taurochenodeoxycholic acid          | C26 H45 N O6 S   | 1.03      |
| 38  | $\alpha$ -Eleostearic acid          | C18 H30 O2       | 1.02      |
